# Supplementary material for: PARP2 mediates branched poly ADP-ribosylation in response to DNA damage
Source: PubMed Central journal article supplement (PMC6089979; doi:10.1038/s41467-018-05588-5), 2018-08-13
Supplement: 41467_2018_5588_MOESM1_ESM.pdf [file 41467_2018_5588_MOESM1_ESM.pdf]

## **Supplementary Information**

### **PARP2 mediates branched polyADP-ribosylation in response to DNA damage**

Chen et al.

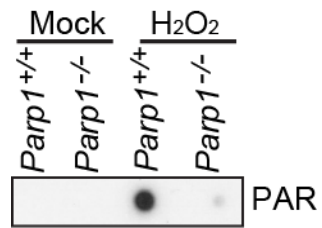

**Supplementary Fig. 1. Loss of PARP1 largely impairs DNA damage-induced**

**PARylation.** *Parp1*<sup>+/+</sup> and *Parp1*<sup>-/-</sup> MEFs were treated with 500  $\mu$ M H<sub>2</sub>O<sub>2</sub>. The levels of PAR were examined using dot blotting.

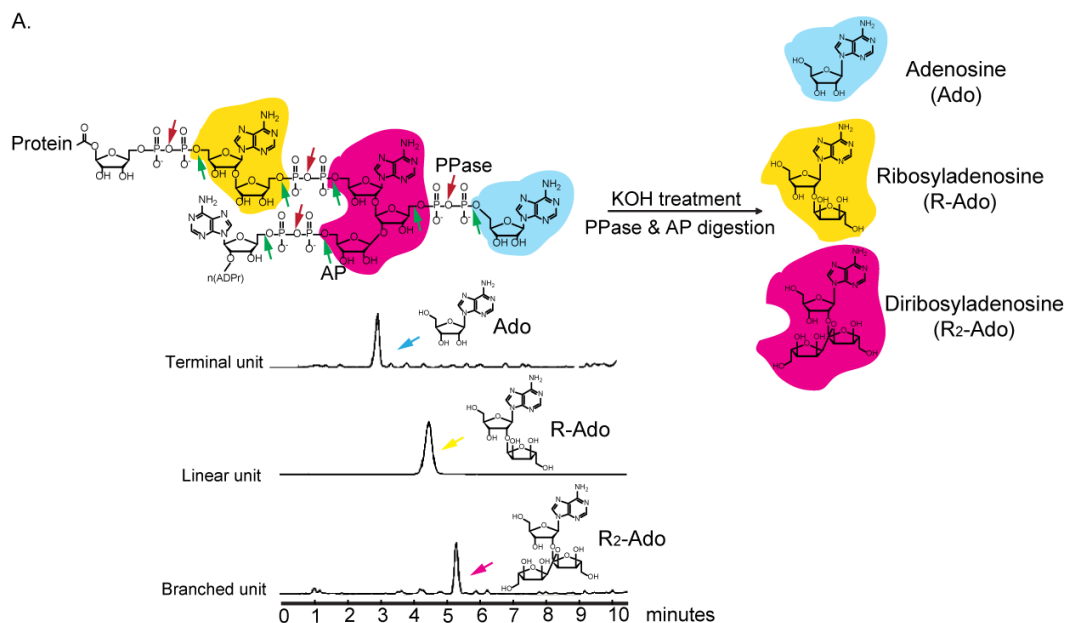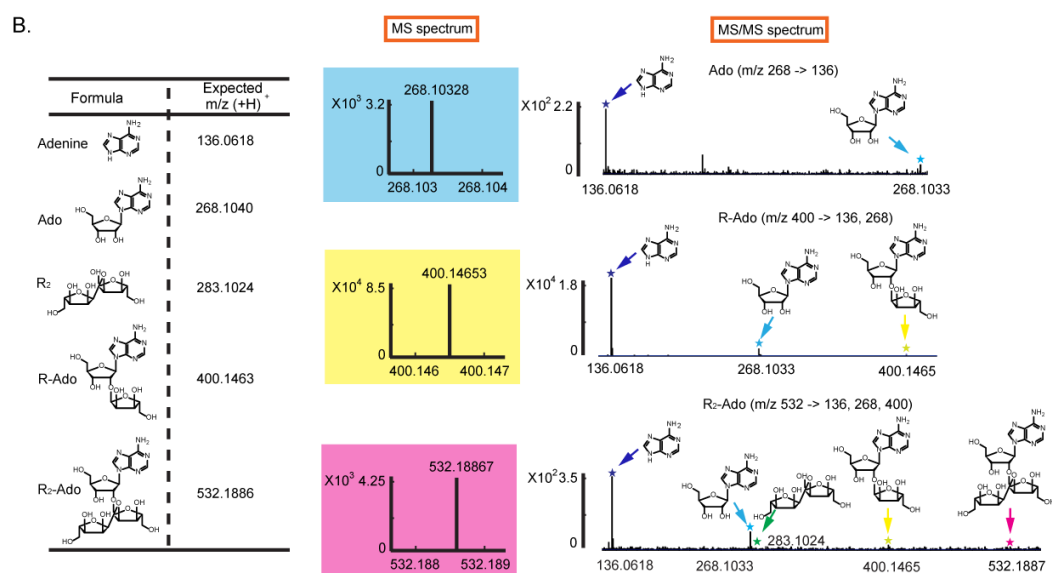

**Supplementary Fig. 2. PAR is examined by LC-MS/MS.** (A) Adenosine (Ado), ribosyladenosine (R-Ado) and diribosyladenosine (R<sub>2</sub>-Ado) were obtained from PAR digestion by pyrophosphatase (PPase) and alkaline phosphatase (AP). Ado, R-Ado and R<sub>2</sub>-Ado indicate the terminal, linear and branched PAR units, respectively. (B) Daughter ions scan of Ado, R-Ado and R<sub>2</sub>-Ado were examined to confirm the parent ions. The expected m/z for individual molecule is indicated.

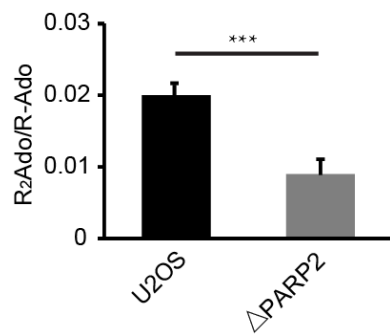

**Supplementary Fig. 3. PARP2 is involved in branched PAR chain formation.**

Depletion of PARP2 reduced the percentage of branched chain. The levels of R<sub>2</sub>-Ado and R-Ado were measured by LC-MS/MS. The ratio of R<sub>2</sub>-Ado/R-Ado suggests branch frequency. Data are represented as mean ± s.d. as indicated from three independent experiments. Significance of differences was evaluated by Student's t test. \*\*\*: Statistically Significant ( $p < 0.001$ ).

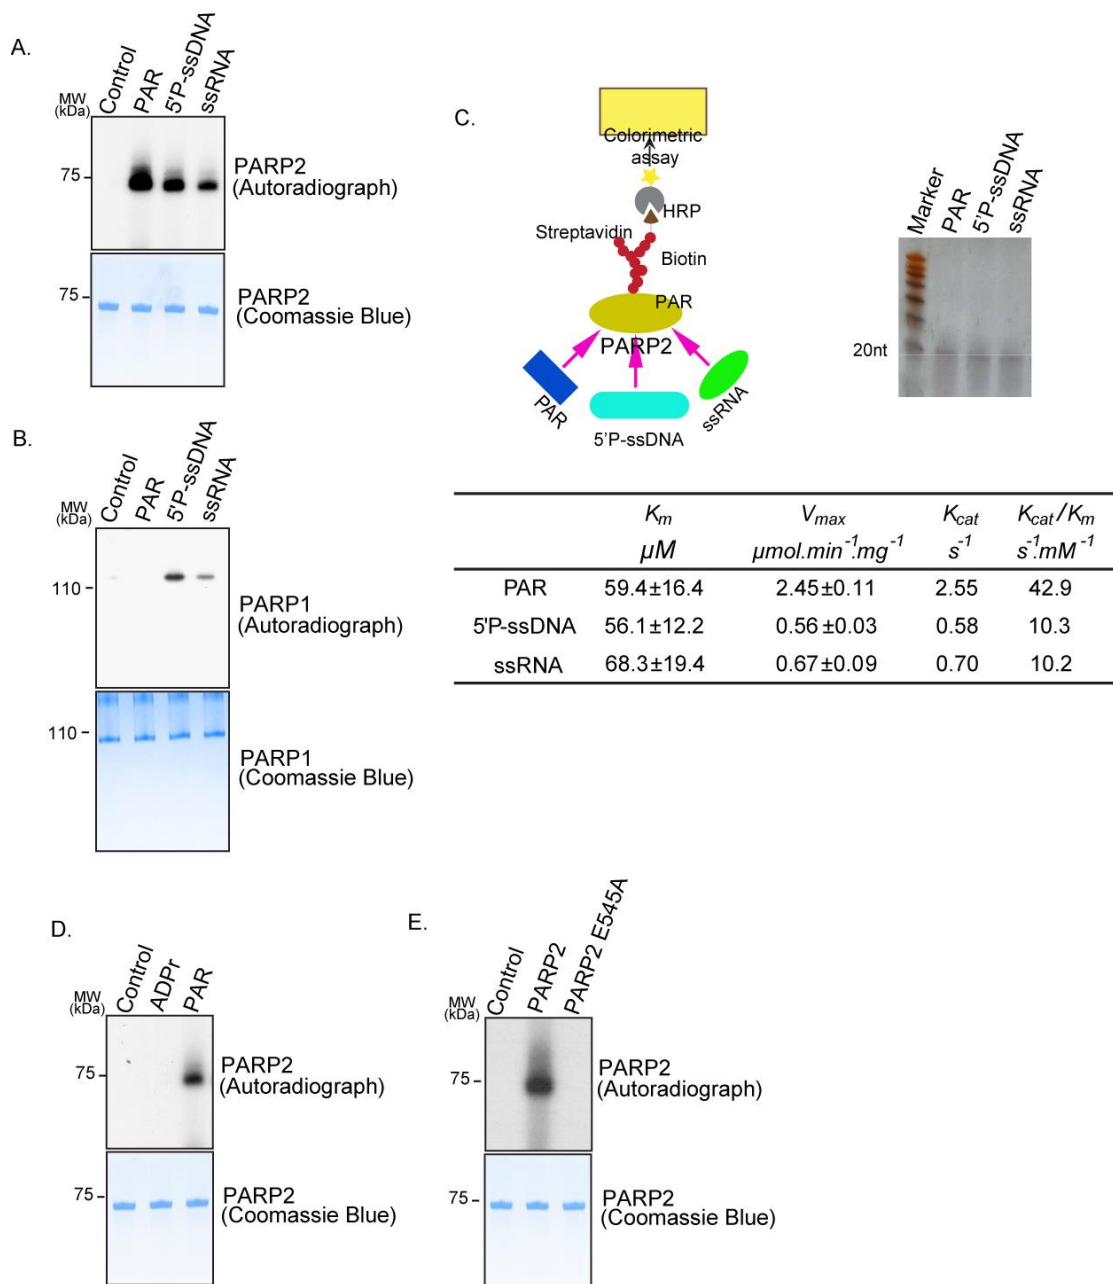

**Supplementary Fig. 4. PARP2 is activated by PAR.** (A, B) *in-vitro* auto-PARylation of PARPs. Recombinant PARP2 (A) or PARP1 (B) incubated with  $^{32}P$ -NAD<sup>+</sup> and various activators including PAR, 5'P-ssDNA or ssRNA. Auto-PARylation was detected by autoradiography (upper panel). Recombinant protein in each reaction was also examined by the SDS-PAGE with Coomassie blue staining (lower panel). (C)

Diagram representing work-flow for colorimetric assay. The  $K_{cat}/K_m$  was measured using colorimetric assay. The level of PARP2 activators were examined by 20% native PAGE. (D) PARP2 cannot be activated by ADPr. (E) Only wide type PARP2, but not the E545A mutant is able to be activated by PAR.

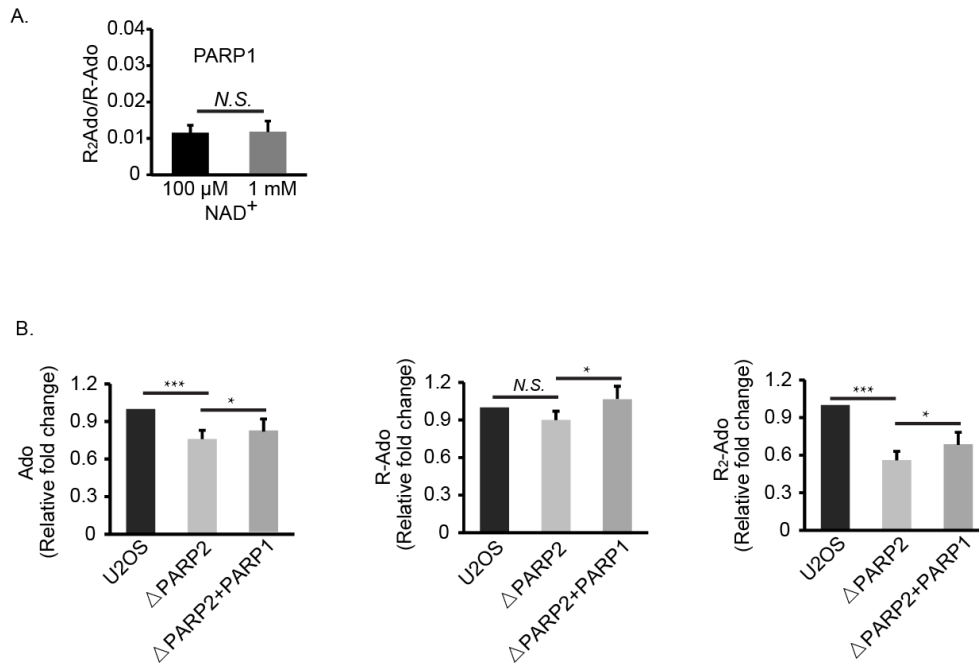

**Supplementary Fig. 5. PARP1 is also able to catalyze branched chain, but at**

**lower rate.** (A) Measurement of branched chain in PARP1-dependent PARylation.

The ratio between R<sub>2</sub>-Ado and R-Ado was calculated. (B) Additional PARP1-

dependent PARylation was analyzed in the PARP2 null cells over-expressing PARP1.

Data are represented as mean ± s.d. as indicated from three independent

experiments. Significance of differences was evaluated by Student's t test. *N.S.*: Non

Significant; \*: Statistically Significant ( $p < 0.05$ ). \*\*\*: Statistically Significant ( $p <$

0.001).

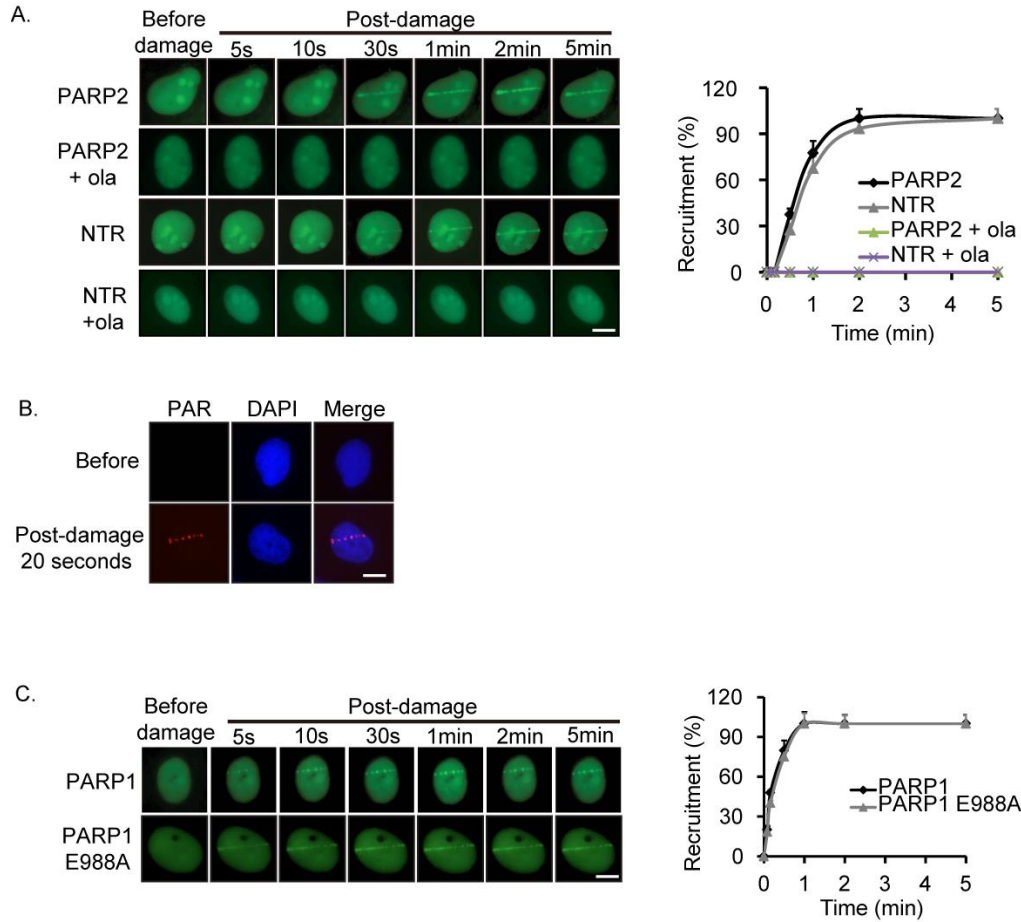

**Supplementary Fig. 6. PARylation is essential for the PARP2 recruitment into the DNA damage sites.** (A) Recruitment of either full-length PARP2 or NTR could be suppressed after PARylation inhibition. (B) PAR was detected at DNA lesions. PARylation was examined by immunostaining using anti-PAR antibody. (C) Catalytic inactive mutant of PARP1 (E988A) still could be recruited into the sites of DNA damage. Scale bar represents 5  $\mu$ m.



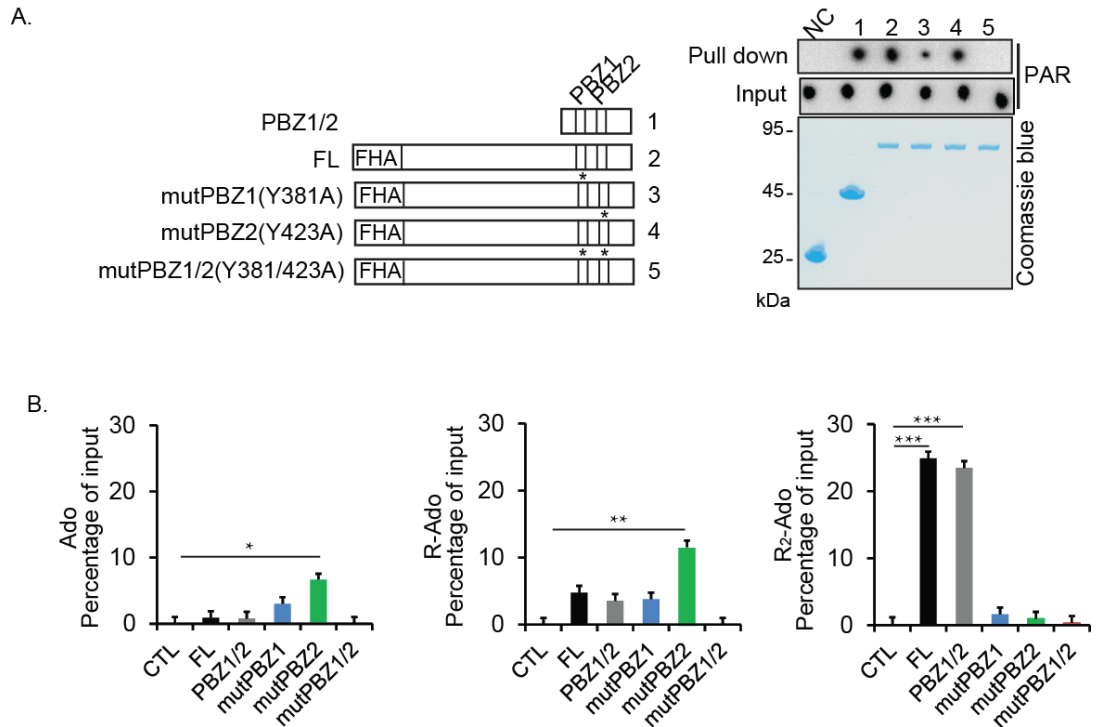

**Supplementary Fig. 7. Loss of PBZ motifs abolishes the binding to the branched sites.**

(A) Mutation the key residue in each PBZ impairs the PAR-binding. The recombinant GST fusion proteins were incubated with  $^{32}\text{P}$  labeled PAR. Protein-PAR complex was pulled down by glutathione agarose beads followed by autoradiography (left panel). Recombinant GST was used as the negative control (NC). The GST fusion proteins were also examined by the SDS-PAGE followed with Coomassie blue staining (right panel). (B) The pull down materials was further examined by mass spectrometry. Data are represented as mean  $\pm$  s.d. as indicated from three independent experiments. Significance of differences was evaluated by Student's t test. \*: Statistically Significant ( $p < 0.05$ ). \*\*: Statistically Significant ( $p < 0.01$ ). \*\*\*: Statistically Significant ( $p < 0.001$ ).

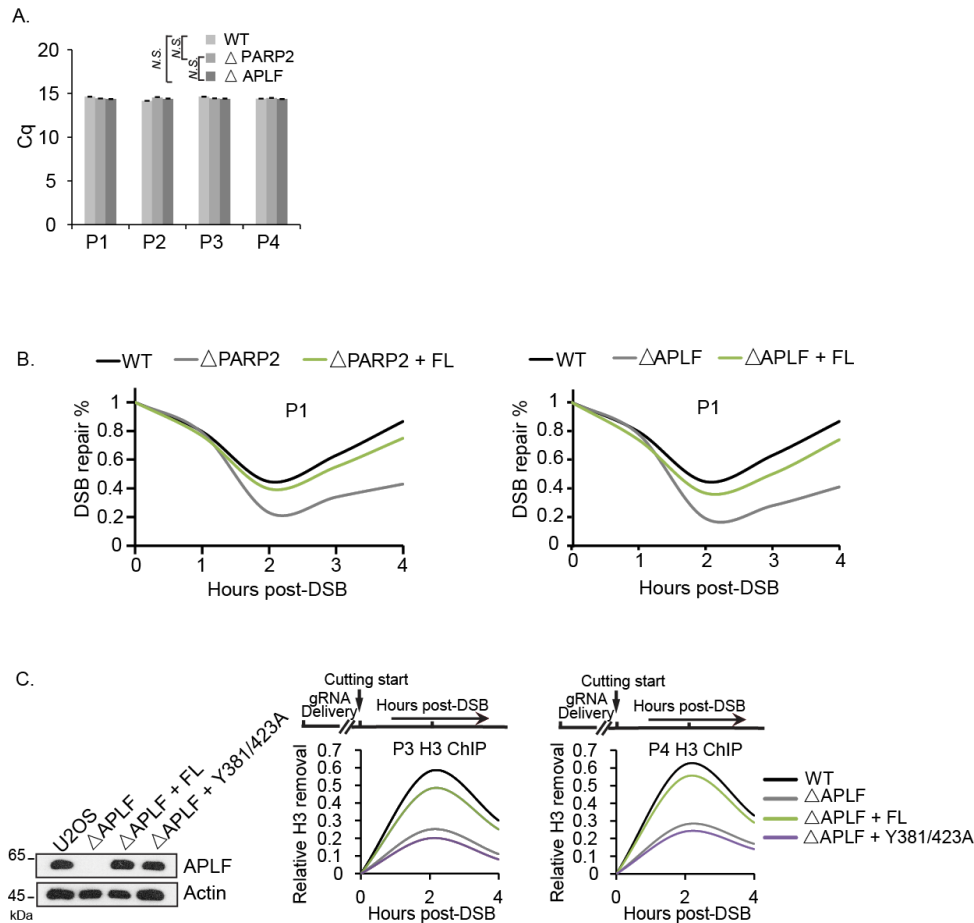

**Supplementary Fig. 8. Both PARP2 and APLF are essential for DSB repair. (A)**

Absolute histone H3 levels at the four loci were examined by q-PCR in the PARP2- or APLF- deficient cells. (B) The DNA repair defect could be rescued by full length PARP2 or APLF (FL). (C) The PBZ motifs of APLF are important for the histone removal at the DSB. APLF-deficient cells ( $\Delta$ APLF) were reconstituted with full length APLF (FL) or the PBZ mutant (Y381/423A). The enrichments of histone H3 at DSB were examined by ChIP assays at indicated time points. Data are represented as mean  $\pm$  s.d. as indicated from three independent experiments. Significance of differences was evaluated by Student's t test. *N.S.*: Non Significant.

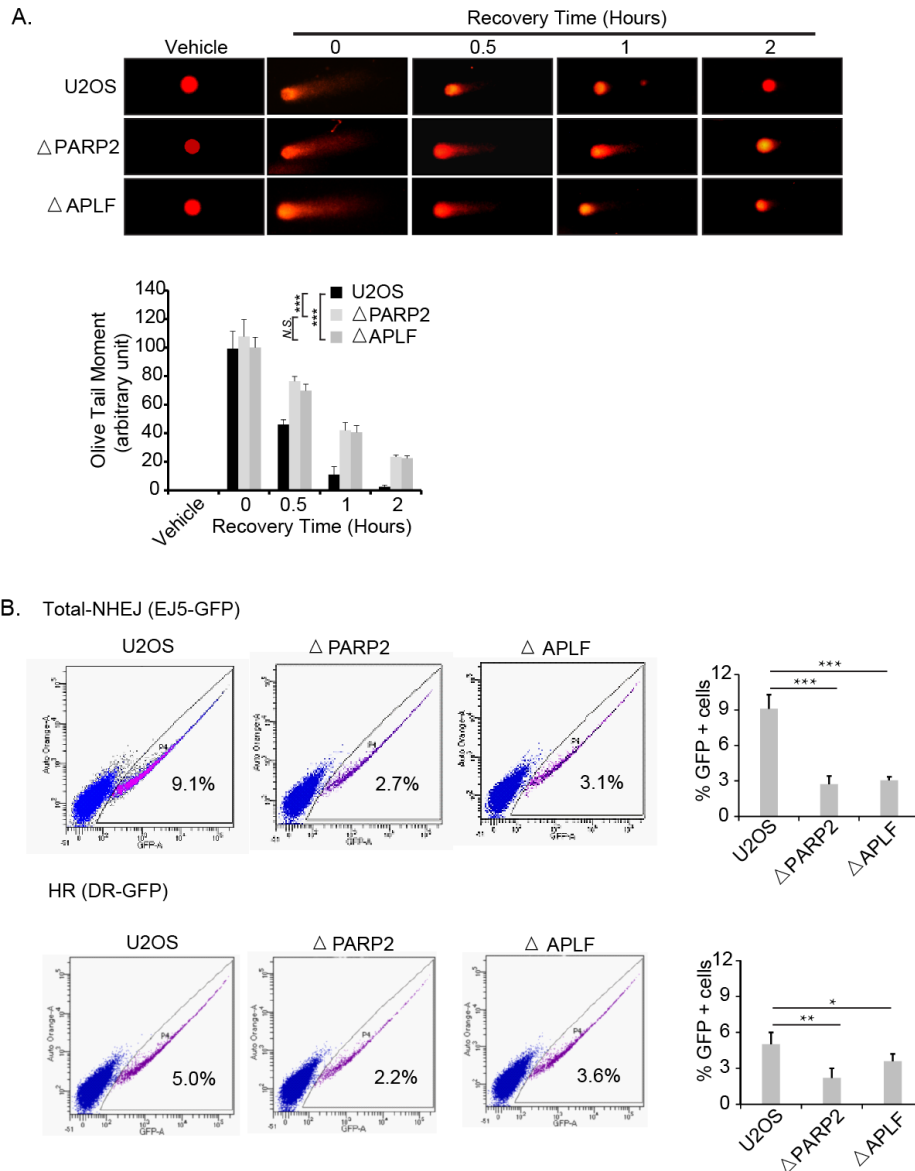

**Supplementary Fig. 9. PARP2 and APLF play important roles in DSB repair. (A)**

The kinetics of DSB repair was examined with neutral comet assays in the PARP2- or APLF- deficient cells. Tail moments were measured from 50 cells and summarized in the histogram. (B) Both PARP2 and APLF participate in NHEJ (EJ5-GFP) or HR repair (DR-GFP). NHEJ or HR repair were examined in U2OS cell expressing the reporter GFP and lacking PARP2 or APLF. Data are represented as mean  $\pm$  s.d. as indicated from three independent experiments. Significance of differences was

evaluated by Student's t test. *N.S.*: Non Significant; \*: Statistically Significant ( $p < 0.05$ ). \*\*: Statistically Significant ( $p < 0.01$ ). \*\*\*: Statistically Significant ( $p < 0.001$ ).

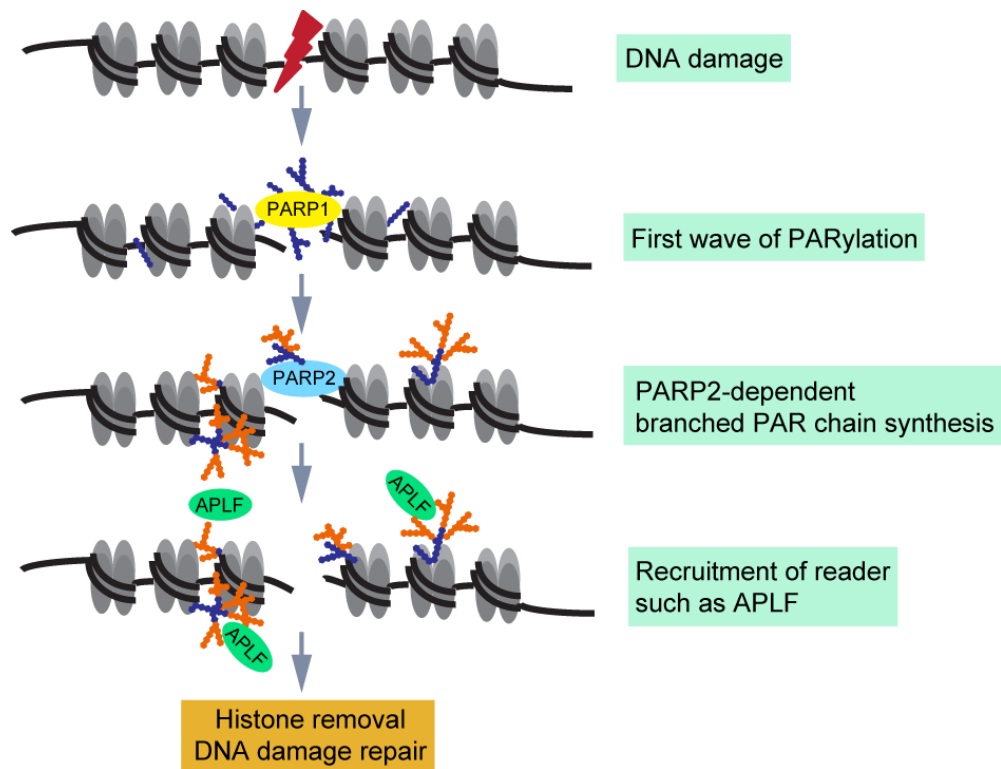

**Supplementary Fig. 10. PARP2-dependent PARylation is a sequential step following initial PARP1-dependent PARylation during DNA damage repair.**

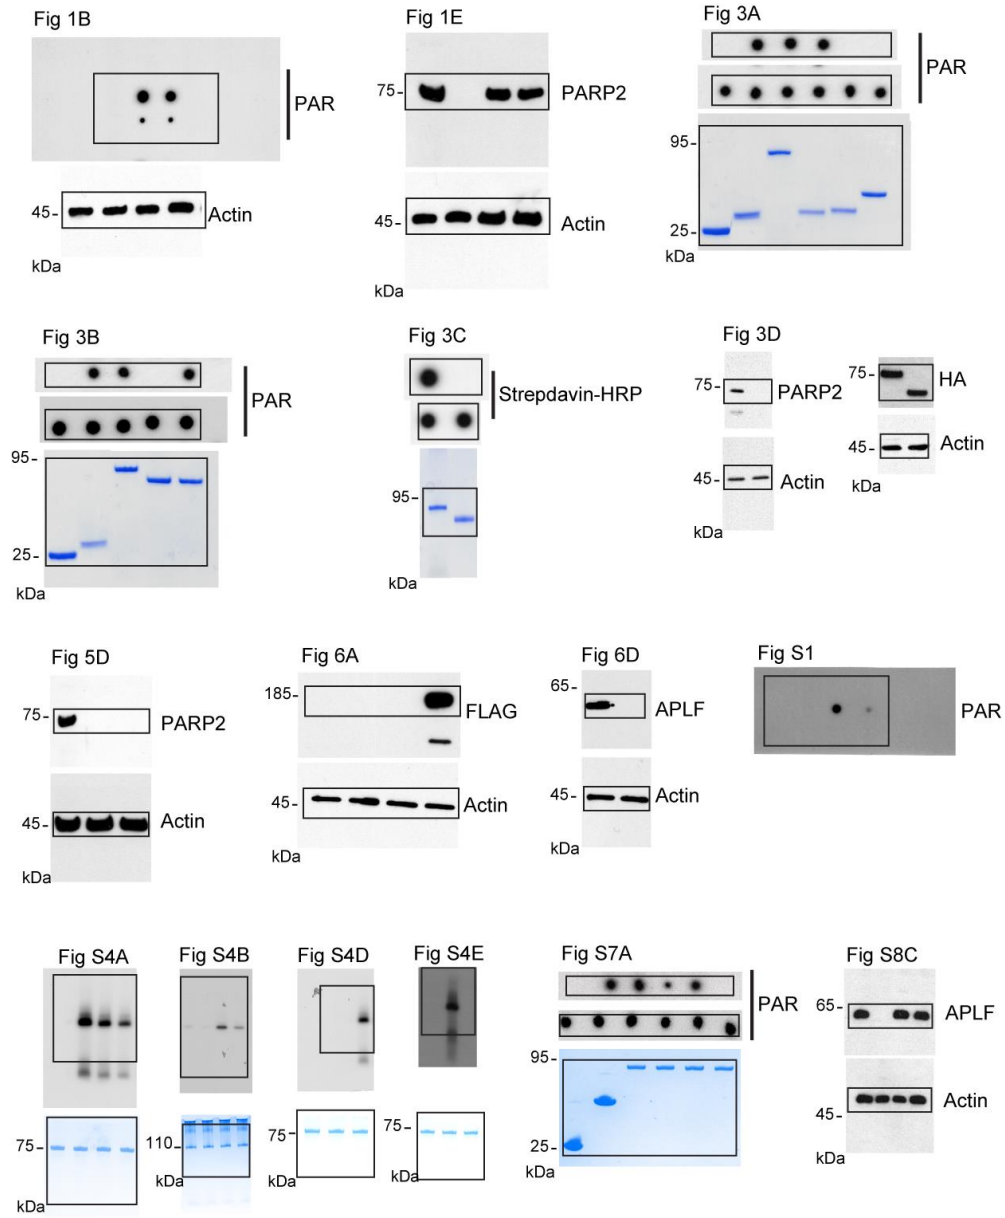

**Supplementary Fig. 11. Original images of all blots and gels shown in this study.**

**Supplementary Table 1. List of primers used in PARP2 constructs**

| Primer Name          | Sequence (5'-3')               |
|----------------------|--------------------------------|
| FL PARP2 Forward     | ATGGCGGCGCGGGCGGCGA            |
| FL PARP2 Reverse     | TCACCACAGCTGAAGGAA             |
| PARP2 NTR Forward    | ATGGCGGCGCGGGCGGCGA            |
| PARP2 NTR Reverse    | CTGGGCTGTACACTCTG              |
| PARP2 WGR Forward    | TCTGAATCTGTGAAG                |
| PARP2 WGR Reverse    | TTTCTTTGTTTCCTC                |
| PARP2 CAT Forward    | TATGATATGCTACAGATG             |
| PARP2 CAT Reverse    | TCACCACAGCTGAAGGAA             |
| $\Delta$ NTR Forward | TCTGAATCTGTGAAG                |
| $\Delta$ NTR Reverse | TCACCACAGCTGAAGGAA             |
| $\Delta$ WGR Forward | GCCACCAATACTCAGGATGA           |
| $\Delta$ WGR Reverse | AGCCTTCCCCACCTTGGCTGT          |
| PARP2 E545A Forward  | CTCAACTACAATGCATATATTGTATATAAC |
| PARP2 E545A Reverse  | GGTATAACCATCTGGATTCAG          |

**Supplementary Table 2. List of primers used in APLF constructs**

| Primer Name            | Sequence (5'-3')           |
|------------------------|----------------------------|
| FL APLF Forward        | ATGTCCGGGGGCTTCGAG         |
| FL APLF Reverse        | TATTTTCTTTTTCATAAAC        |
| mutPBZ1(Y381A) Forward | CATCCTGCATGGCTGGGGCAAACCTG |
| mutPBZ1(Y381A) Reverse | TCCTCTTGACCTTGTTTCC        |
| mutPBZ1(Y423A) Forward | TGAATGTCCCGCTGGACCATCCTG   |
| mutPBZ1(Y423A) Reverse | GGCCGGTCATCAGTCTCATC       |
| APLF PBZ1/2 Forward    | TCACTTCAGGATGAGTCTC        |
| APLF PBZ1/2 Reverse    | TATTTTCTTTTTCATAAAC        |



**Supplementary Table 3. List of primers used in histone H3 removal examination**

| Primer Name   | Sequence (5'-3')     |
|---------------|----------------------|
| P1 Forward    | GTCACCAATCCTGTCCCTA  |
| P1 Reverse    | CAGGACAGCATGTTTGCTGC |
| P2 Forward    | GGGAAATGGAGTCCATTAG  |
| P2 Reverse    | CCTGTAGACTCCATTTCCTA |
| P3 Forward    | GCACCAGACGGCCGCGTCAG |
| P3 Reverse    | CCAGAGAGGATCCTGGGAGG |
| P4 Forward    | GAATCCACAGGAGAACGGG  |
| P4 Reverse    | CGTCCCGCCTCCCCTTCTTG |
| GAPDH Forward | GAGGGAGGTAGAGGGGTGAT |
| GAPDH Reverse | ATCACGCCACAGTTTCCCG  |

**Supplementary Table 4. List of antibodies used in the study**

| Antibody                   | Company                  | Catalog #   | Source                     | Application                    | Dilution         |
|----------------------------|--------------------------|-------------|----------------------------|--------------------------------|------------------|
| PARP2                      | Millipore                | MABE18      | Mouse monoclonal antibody  | Western Blot                   | 1:1000           |
| APLF                       | Thermo Fisher Scientific | PA5-39776   | Rabbit polyclonal antibody | Western Blot                   | 1:1000           |
| FLAG                       | Sigma                    | F3165       | Mouse monoclonal antibody  | Western Blot                   | 1:5000           |
| $\gamma$ H <sub>2</sub> AX | Abcam                    | ab11174     | Rabbit polyclonal antibody | Immunofluorescence             | 1:1000           |
| Actin                      | Sigma                    | A2228       | Mouse monoclonal antibody  | Western Blot                   | 1:5000           |
| histone H3                 | Millipore                | 06-755      | Rabbit polyclonal antibody | ChIP                           | 1:500            |
| PAR                        | Trevigen                 | 4335-MC-100 | Mouse monoclonal antibody  | Dot Blot                       | 1:2000           |
| HRP-Streptavidin           | Thermo Fisher Scientific | N100        |                            | Immunofluorescence<br>Dot Blot | 1:1000<br>1:2000 |
